# Supplementary material
Source: Springer Nature journal article supplement (https://www.springermedizin.de/resource/supplementary/12936_2009_911_MOESM4_ESM.pdf/9548522)

Cytophilic-noncytophilic ratio

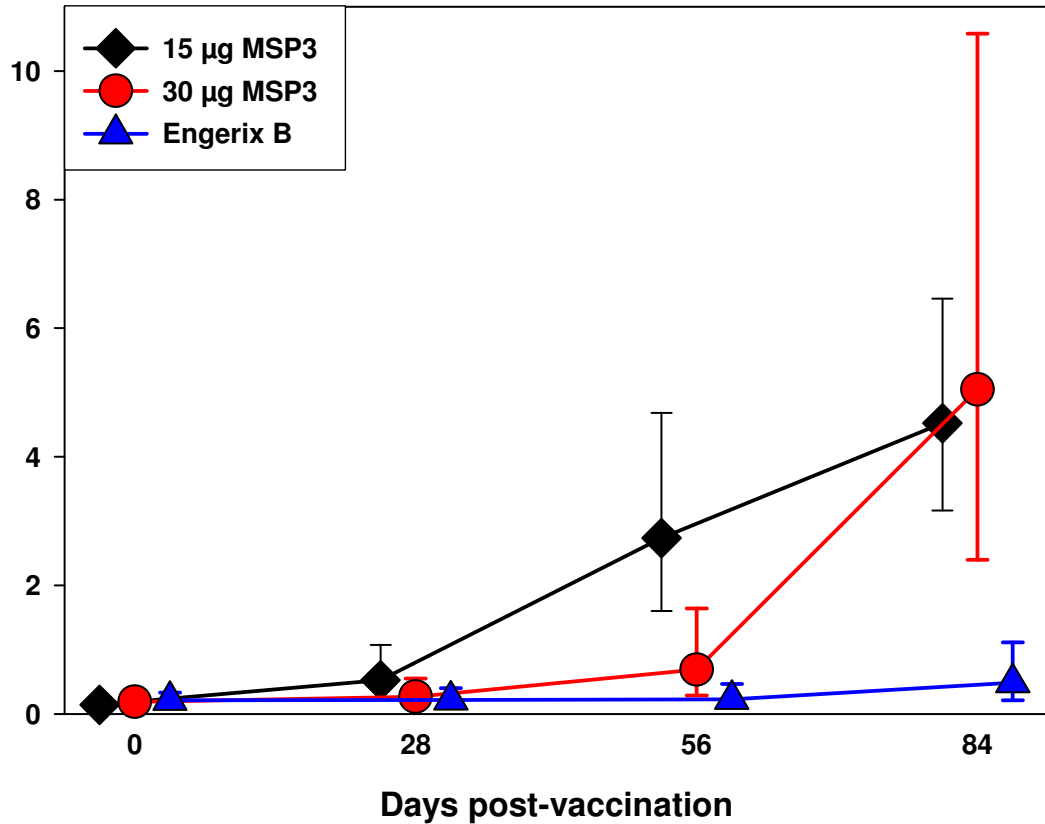

Supplement: MOESM4 [file 9548522]
